# Supplementary material for: A highly interweaved HA-SS-nHAp/collagen hybrid fibering hydrogel enhances osteoinductivity and mineralization
Source: Royal Society of Chemistry journal article supplement (doi:10.1039/d0nr01824d), 2020-01-01
Supplement: d0nr01824d1.pdf [file d0nr01824d1.pdf]

## Supporting Information

# Highly Interweaved HA-ss-nHAp/Collagen Hybrid Fibered Hydrogel Enhanced Osteoinductivity and Mineralization

*Xing Li<sup>1</sup>, Manyu Chen<sup>1</sup>, Peilei Wang<sup>1</sup>, Ya Yao<sup>1</sup>, Xiaowen Han<sup>1</sup>, Jie Liang<sup>1,2</sup>, Qing Jiang<sup>1</sup>, Yong Sun,<sup>1\*</sup> Yujiang Fan<sup>1</sup> and Xingdong Zhang<sup>1</sup>*

<sup>1</sup>National Engineering Research Center for Biomaterials, Sichuan University, 29 Wangjiang Road, Chengdu, Sichuan, 610064, P. R. China

<sup>2</sup>Sichuan Testing Center for Biomaterials and Medical Devices, Sichuan University, 29 Wangjiang Road, Chengdu, 610064, China.

## Corresponding Author

Yong Sun\*

Biomaterials Building, Sichuan University, Chengdu 610064, China

Tel: +86-28-85417654 Fax: +86-28-85417654 e-mail: sunyong8702@scu.edu.cn

**Table S1.** Primers used to amplify mRNAs encoding rabbit  $\beta$ -Actin.

| <b>Primer</b>    | <b>Sequence (5'-3')</b> |
|------------------|-------------------------|
| $\beta$ -Actin-F | TGGCTCTAACAGTCCGCCTAG   |
| $\beta$ -Actin-R | AGTGCGACGTGGACATCCG     |
| Runx2-F          | TGGCGGGTAATGATGAAAAT    |
| Runx2-R          | GAGGCGGTCAGAGAACAAA     |
| OCN-F            | GACACCATGAGGACCCTCTC    |
| OCN-R            | GCCTGGTAGTTGTTGTGAGC    |
| OPN-F            | CGCCGTGATTTGCTTTTGTC    |
| OPN-R            | GCATCCGGGTGTTTGTGGTA    |

**Table S2.** Atomic percentages of N, Si, C and N/Ca ratio observed from XPS survey scans

| <b>Sample</b>           | <b>N(%)</b> | <b>Si(%)</b> | <b>C(%)</b> | <b>N/Ca</b> |
|-------------------------|-------------|--------------|-------------|-------------|
| HAp                     | 0           | 0            | 12.13 ± 1.2 | 0           |
| HAp-A alcohol solution  | 3.25 ± 0.3  | 3.80 ± 0.5   | 24.02 ± 1.3 | 0.23 ± 0.02 |
| HAp-A anhydrous toluene | 4.03 ± 0.4  | 4.87 ± 0.3   | 23.84 ± 1.0 | 0.26 ± 0.03 |
| HAp-T-A                 | 4.35 ± 0.2  | 16.42 ± 0.2  | 22.26 ± 1.4 | 0.61 ± 0.01 |
| HAp-NH <sub>2</sub>     | 4.69 ± 0.1  | 12.61 ± 0.1  | 34.17 ± 1.0 | 0.63 ± 0.01 |

**Table S3.** The results of surface grafting reaction.

| <b>Sample</b>           | <b>Weight retention (%)</b> | <b>Total grafting content (%)</b> |
|-------------------------|-----------------------------|-----------------------------------|
| HAp                     | 93.09                       | 0                                 |
| HAp-A alcohol solution  | 91.91                       | 1.18                              |
| HAp-A anhydrous toluene | 91.60                       | 1.49                              |
| HAp-T-A                 | 85.74                       | 7.35                              |
| HAp-NH <sub>2</sub>     | 81.30                       | 11.79                             |

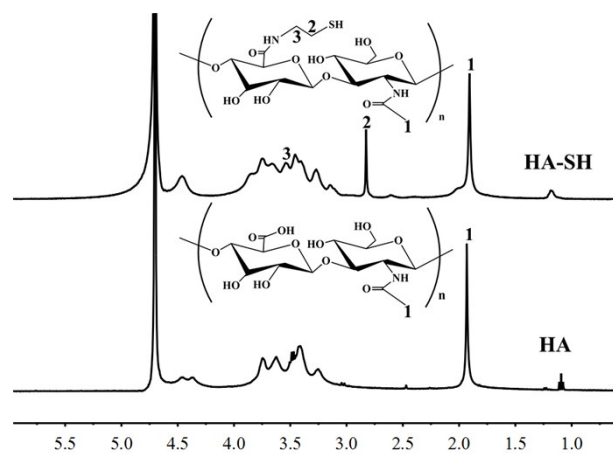

**Figure S1.** <sup>1</sup>H-NMR (D<sub>2</sub>O) spectra of HA and HA-SH.

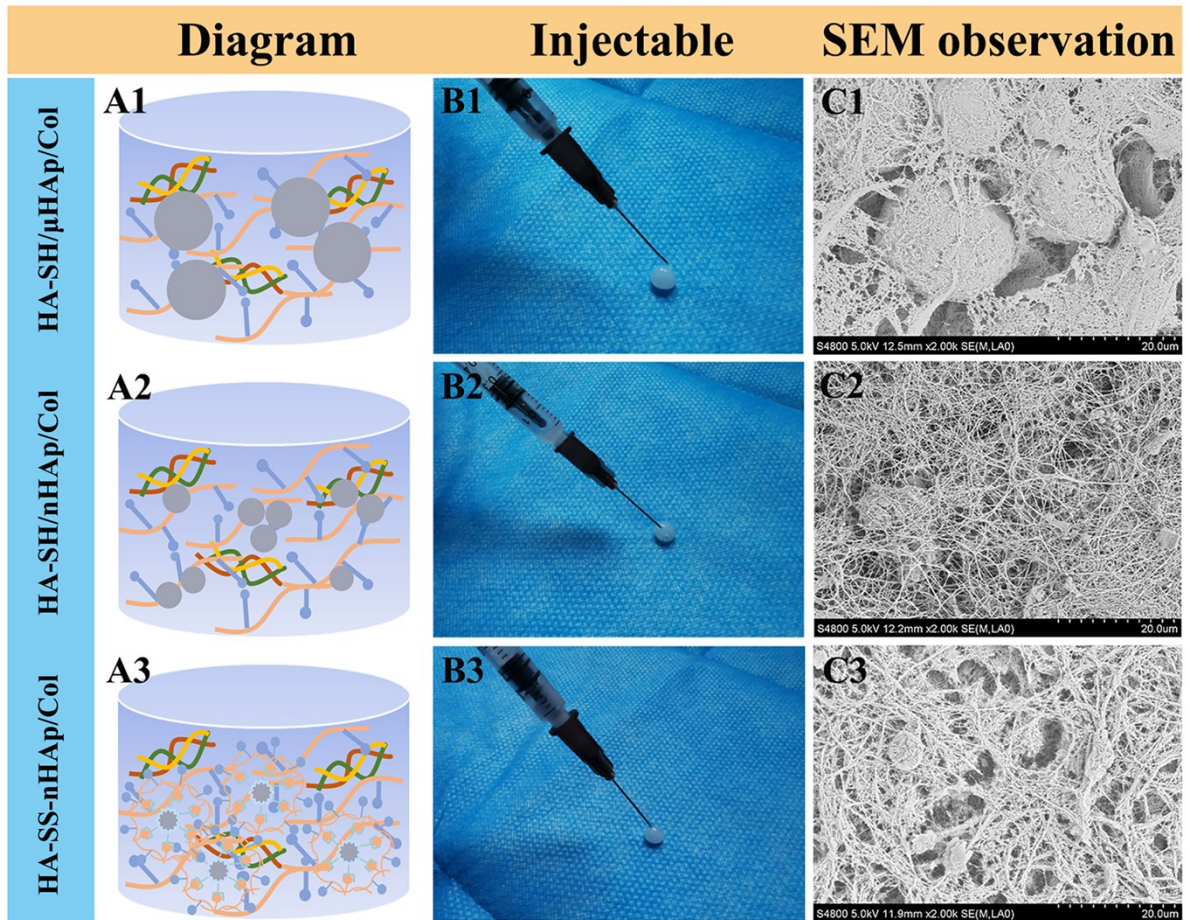

**Figure S2.** (A1-A3) The schematic diagram for inner structure of three hybrid hydrogels. (B1-B3) Injection images of hybrid hydrogels. (C1-C3) SEM images of three hybrid hydrogels.

The disintegration performance of hydrogels in type I collagenase was tested under following condition: The prepared disc-shaped hydrogels were freeze-dried and weighed ( $W_o$ ). And then, they were immersed in deionized water containing 100  $\mu\text{g}/\text{mL}$  type I collagenase in a constant temperature shaker at 90 rpm at 37 °C. At a certain time interval, the hydrogels were taken out and washed in distilled water, freeze-dried and weighed again ( $W_r$ ). Every sample was measured in three replicates. The disintegration performance of hydrogels was expressed as percentage of weight loss and was calculated as follows:  $\text{Weight loss percentage} = (W_o - W_r) / W_o \times 100\%$ .

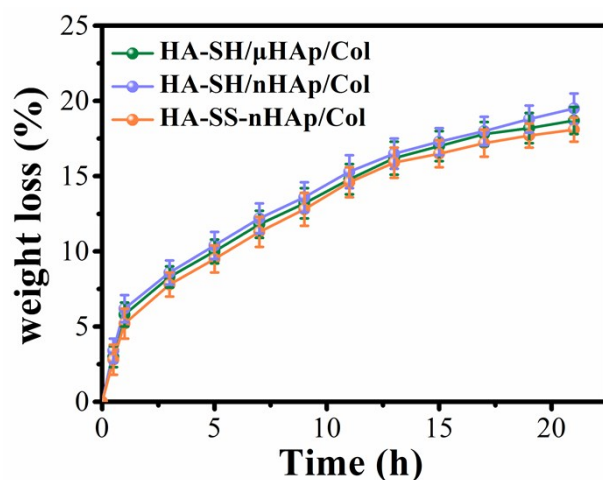

**Figure S3.** Disintegration behaviour for hybrid hydrogels in type I collagenase.

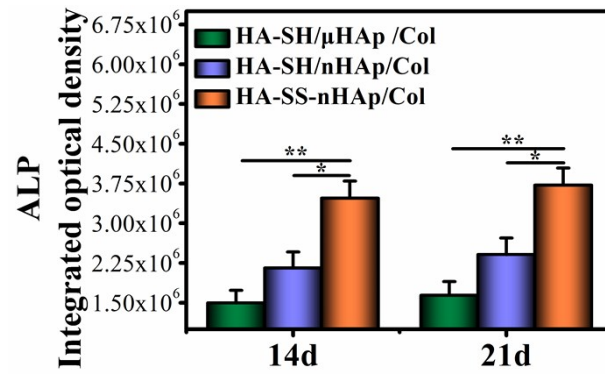

**Figure S4.** The semi-quantitative results for ALP staining. The data were presented as mean  $\pm$  standard deviations (SD) from 3 independent experiments (n= 3). \*p < 0.05, \*\*p < 0.01 and \*\*\*p < 0.001.
